# Supplementary material for: Multiplexed ionic current sensing with glass nanopores
Source: Royal Society of Chemistry journal article supplement (doi:10.1039/c3lc50069a), 2013-01-01
Supplement: c3lc50069a.pdf [file c3lc50069a.pdf]

### Supplementary information

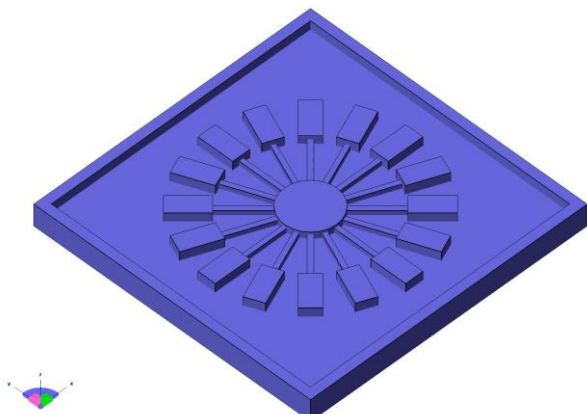

**Figure S1** – Rendering of 3D printed mold used in device fabrication. The inverse replica is made by pouring over PDMS and curing it by baking at 60°C for 24 hours.

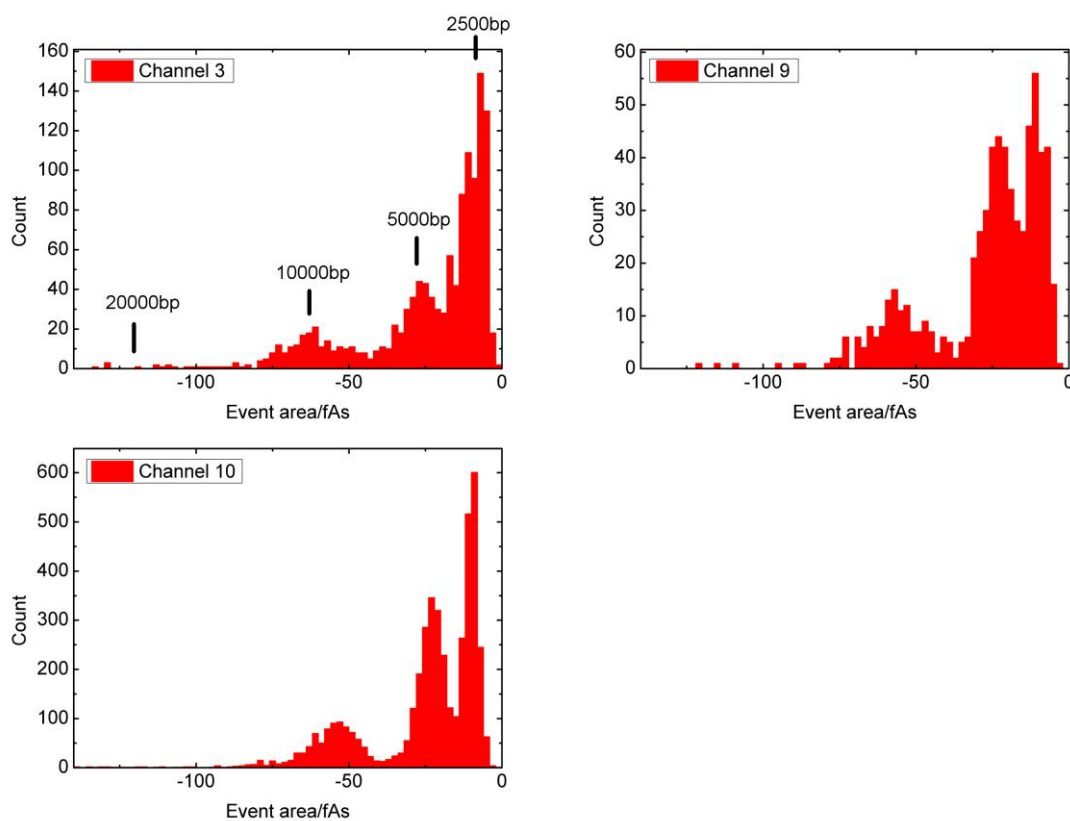

**Figure S2** – Histograms of total charge excluded by each translocation event (event area) cf. Fig 1d. The four DNA lengths are labelled for channel 3.
